# Supplementary material
Source: publisher figshare collection journal article supplement (https://tandf.figshare.com/ndownloader/files/13701167)
Supplement: Supplementary file 1 [file 13701167]

**Table S1: Reports of various polymorphisms in vitiligo patients and controls**

| **Cytokine (* mark indicates significant association)** | | **Sample Type/**  **Sample Size: Patients (Controls) &**  **Ethnicity** | | | **Genotype-Phenotype correlation** | **Salient feature of polymorphism** |
| --- | --- | --- | --- | --- | --- | --- |
| **Interleukin 1 *(IL1)*** | | | | | | |
| **IL1B*  promoter -511 C/T (rs16944)  [1] | | PBC/  448 (785)  Indian (Gujarat) | | | Increased *IL1B* in vitiligo patients, AV and females. | TT genotype  showed significantly increased *IL1B* |
| *ILRN*  intron 2 VNTR (rs2234663)  [2] | | PBC/  48 (50) Turkish | | | - | These tandem VNTR might act as putative binding sites for transcription factors.  [4] |
| *ILRN*  (rs2234663)  [3] | | PBC/  31 (79) Korean | | | - |
| **Interleukin 4 *(IL4)*** | | | | | | |
| **IL4*  intron 3 VNTR (rs2243250)  promoter -590 (rs2243250)  [5] | | | PBC/Serum  1101 (1141) Indian (Gujarat & North India) | | Increased what in Gujarat (low prevalence in North India) | The three tandem repeat alleles enhance *IL*4 transcription [6].  -590 (rs2243250) C to T transitionis associated  with enhanced promoter strength |
| *IL4*  promoter -590 (rs2243250)  **IL4R* exon (rs1801275) (Q155R)  [7] | | | Whole blood/  96 (87)  Arab | | N/A | Q551R : The R576 allele was associated  with higher levels of expression of CD23 by interleukin-4  than the wild-type allele [8] |
| *IL4*  promoter -590 C/T (rs2243250)  [2] | | | PBC/  48 (50) Turkish | | Increased susceptibility to vitiligo |
| **Interleukin 6 (*IL6*)** | | | | | | |
| promoter -174 C/G (rs1800795)  [9] | | PBC/  105 (211) Turkish | | | N/A | Regulatory effect on its transcript as well as protein levels with respect to G allele [10] |
| **Interleukin 10 (*IL10*)** | | | | | | |
| *promoter -1082 (rs1800896)  [9] | | Serum/  105 (211) Turkish | | | N/A | -1082 GG, -819 CC &  -592 CC promoter alleles are associated with higher *IL10* production.  [12] |
| *promoter -1082 C/G (rs1800896)  * -819 C/T (rs1800871)  * -592C/A (rs1800872)  [11] | | Whole blood/  83 (101)  Arab | | | N/A |
| **Interferon-γ (*IFNG*)** | | | | | | |
| intron 1 +874 A/T  (rs2430561)  * CA microsatellite  (rs3138557)  [13] | | PBC/  517 (881) Indian  (Gujarat) | | | N/A | Allele 2, with 12 CA repeats is associated with *in vitro* constitutive high IFN-γ production [13].  Presence of *IFNG* (+874A/T) polymorphism creates a putative NF-kB binding site showing preferential binding to the T allele corresponding to increased IFN-γ production [15]. |
| increased IFN-γ & ICAM-1, higher in females |
| intron 1 +874 A/T  (rs2430561)  [14] | | PBC/  176 (545) Iranian | | | N/A |
|  | **Tumor Necrosis Factor-β *(TNFB)*** | | | | | |
|  | * intron 1 +252  G/A (rs909253)  [16] | | | Whole blood/  123(200)  Saudi | Marginally increased expression | rs909253 and rs1041981 are found to influence *TNFB*  expression *in vitro* [18] |
|  | * intron 1 +252 A/G(rs909253);  IVS1 +90 A/G  exon 3 C/A (rs1041981) [17] | | | Whole blood  524 (592)  Indian  (Gujarat) | Increased *TNF*-β and *ICAM*-1 |
| **Tumor Necrosis Factor-α *(TNFA)*** | | | | | | |
| * promoter -308 G/A  (rs1800629)  [16] | | | | Whole blood/  123 (200)  Saudi | N/A | The promoter polymorphisms at positions: -238, -308, -857,  and -1031 may lead to a higher rate of *TNFA* gene transcription whereas -863 leads to decrease in the *TNFA*. |
| *promoter -308 G/A  (rs1800629)  [19] | | | | Whole blood/  198 (395)  North eastern Mexican population | N/A |
| *promoter -308 G/A  (rs1800629)  [20] | | | | Whole blood/  977 (990)  Indian  (Gujarat) | Increased *TNF*-α transcript protein |
| * -238 G/A (rs361525),  -857 C/T (rs1799724),  *-1031 (rs1799964)  [20] | | | | Whole blood  524 (592)  Indian  (Gujarat) | -238: Increased susceptibility |
| -857: Increased susceptibility |
| -1031: Decreased susceptibility to vitiligo |
| *promoter -308 G/A  (rs1800629)  [14] | | | | PBC/  176 (545)  Iranian | N/A |
| promoter -308 G/A  (rs1800629)  [21] | | | | Whole blood/  61 (123)  Turkish | N/A |
| **Cytotoxic T-lymphocyte-associated protein 4 (*CTLA4*)** | | | | | | |
|  | exon 1 +49 (rs231775)  * 3’UTR CT60 (rs3087243)  [22] | | | PBC/ 437(746) Indian (Gujarat) | N/A | Increased *sCTLA-4 ⁄ flCTLA-4* mRNA ratio with +49AG and CT60GG genotypes in vitiligo patients suggests that G allele confers lower *sCTLA-4* transcript levels. [22, 23] |
| GG genotype shows higher phenotypic occurrence |
|  | *exon 1 +49 (rs231775)  [2] | | | PBC/  48 (50) Turkish | Susceptibility increased in patients with GG genotype, while reduced in AA phenotype |  |
|  | 3’UTR CT60 (rs3087243)  exon 1 +49 (rs231775)  (rs1863800) (rs11571302)  (rs11571297)  (rs10932037)  [24] | | | PBC/ saliva/  712(none) Caucasian | N/A |  |
|  | 3’UTR (rs3087243)  (rs11571302)  (rs11571297)  exon 1 +49 (rs231775)  [25] | | | Whole blood/  100 (140) UK | N/A |  |
|  | exon3, 106 bp allele  [26] | | | Whole blood/  74 (173) British | Susceptibility observed only for patients who have other autoimmune disease condition |  |
| **C-C Chemocine Receptor 5 (*CCR5*)** | | | | | | |
| 32 bp deletion  [2] | | | | PBC/  48 (50) Turkish | N/A | 32 base pair deletion (CCR5-delta32) that introduces a premature stop-codon into the CCR5 locus [27] |

**References:**

1. Laddha NC, Dwivedi M, Mansuri MS, Singh M, Patel HH, Agarwal N, Shah AM, Begum R. Association of neuropeptide Y (NPY), interleukin-1B (IL1B) genetic variants and correlation of IL1B transcript levels with vitiligo susceptibility. PloS one. 2014 Sep 15;9(9):e107020.
2. Pehlivan S, Ozkinay F, Alper S, Onay H, Yuksel E, Pehlivan M, Ozkinay C. Association between IL4 (–590), ACE (I)/(D), CCR5 (Δ32), CTLA4 (+ 49) and IL1-RN (VNTR in intron 2) gene polymorphisms and vitiligo. European Journal of Dermatology. 2009 Mar 1;19 (2):126-8.
3. Lee YS, Park KC, Youn SW, Bang HD, Kim KH. Polymorphism in the IL-1 receptor antagonist gene in vitiligo. Annals of Dermatology. 1995 Oct 1; 7(4):299-302.
4. Tarlow, J.K., Blakemore, A.I., Lennard, A., Solari, R., Hughes, H.N., Steinkasserer, A. and Duff, G.W., 1993. Polymorphism in human IL-1 receptor antagonist gene intron 2 is caused by variable numbers of an 86-bp tandem repeat. Human genetics, 91(4), pp.403-404.
5. Imran M, Laddha NC, Dwivedi M, Mansuri MS, Singh J, Rani R, Gokhale RS, Sharma VK, Marfatia YS, Begum R. Interleukin‐4 genetic variants correlate with its transcript and protein levels in patients with vitiligo. British Journal of Dermatology. 2012 Aug;167(2):314-23.
6. Nakashima, H., Miyake, K., Inoue, Y., Shimizu, S., Akahoshi, M., Tanaka, Y., Otsuka, T. and Harada, M., 2002. Association between IL-4 genotype and IL-4 production in the Japanese population. Genes and immunity, 3(2), p.107.
7. Al-Shobaili H A, Settin AA and Ismail H. Association of IL-4 -590 T/C and IL-4 receptor Q551R gene polymorphisms with vitiligo. J Clin Exp Dermatol Res, 3:2 doi: <http://dx.doi.org/10.4172/2155-9554.S1.04>
8. Hershey GKK, Friedrich MF, Esswein, L.A., Thomas, M.L. and Chatila, T.A., 1997. The association of atopy with a gain-of-function mutation in the α subunit of the interleukin-4 receptor. New England Journal of Medicine,337(24), pp.1720-1725.
9. Aydıngöz IE, Kanmaz‐Özer M, Gedikbaşi A, Vural P, Doğru‐Abbasoğlu S, Uysal M. The combination of tumour necrosis factor‐α− 308 A and interleukin‐10− 1082 G gene polymorphisms and increased serum levels of related cytokines: susceptibility to vitiligo. Clinical and experimental dermatology. 2015 Jan;40(1):71-7.
10. Fishman, D., Faulds, G., Jeffery, R., Mohamed-Ali, V., Yudkin, J.S., Humphries, S. and Woo, P., 1998. The effect of novel polymorphisms in the interleukin-6 (IL-6) gene on IL-6 transcription and plasma IL-6 levels, and an association with systemic-onset juvenile chronic arthritis. Journal of Clinical Investigation, 102(7), p.1369.
11. Abanmi A, Al Harthi F, Zouman A, Kudwah A, Jamal MA, Arfin M, Tariq M. Association of Interleukin-10 gene promoter polymorphisms in Saudi patients with vitiligo. Disease markers. 2008; 24(1):51-7.
12. Asadullah, K., Sterry, W. and Volk, H.D., 2003. Interleukin-10 therapy—review of a new approach. Pharmacological reviews, 55(2), 241-269.
13. Dwivedi M, Laddha NC, Shah K, Shah BJ and Begum R,. Involvement of interferon-gamma genetic variants and intercellular adhesion molecule-1 in onset and progression of generalized vitiligo. Journal of Interferon & Cytokine Research. 2013: 33(11); 646-659.
14. Namian AM, Shahbaz S, Salmanpoor R, Namazi MR, Dehghani F, Kamali-Sarvestani E. Association of interferon-gamma and tumor necrosis factor alpha polymorphisms with susceptibility to vitiligo in Iranian patients. Archives of dermatological research. 2009 Jan 1;301(1):21-5.
15. Pravica, V., Perrey, C., Stevens, A., Lee, J.H. and Hutchinson, I.V., 2000. A single nucleotide polymorphism in the first intron of the human IFN-γ gene:: Absolute correlation with a polymorphic CA microsatellite marker of high IFN-γ production. Human immunology, 61(9), pp.863-866.
16. Al-Harthi F, Zouman A, Arfin M, Tariq M, Al-Asmari A. Tumor necrosis factor-α and-β genetic polymorphisms as a risk factor in Saudi patients with vitiligo. Genet Mol Res. 2013;12(3):2196-204.
17. Laddha NC, Dwivedi M, Gani AR, Mansuri MS, Begum R. Tumor Necrosis Factor B (TNFB) Genetic Variants and Its Increased Expression Are Associated with Vitiligo Susceptibility. PLoS ONE (2013) 8(11): e81736. https://doi.org/10.1371/journal.pone.0081736
18. Messer G, Spengler U, Jung MC, Honold G, Blömer K, Pape GR, Riethmüller G, Weiss EH. Polymorphic structure of the tumor necrosis factor (TNF) locus: an NcoI polymorphism in the first intron of the human TNF-beta gene correlates with a variant amino acid in position 26 and a reduced level of TNF-beta production. Journal of Experimental Medicine. 1991 Jan 1;173(1):209-19.
19. Salinas-Santander M, Díaz-García D, Rojas-Martínez A, Cantú-Salinas C, Sánchez-Domínguez C, Reyes-López M, Cerda-Flores RM, Ocampo-Candiani J, Ortiz-López R. Tumor necrosis factor-α-308G/A polymorphism is associated with active vitiligo vulgaris in a northeastern Mexican population. Experimental and therapeutic medicine. 2012; 3(5): 893-7.
20. Laddha NC, Dwivedi M, Begum R. Increased Tumor Necrosis Factor (TNF)-α and its promoter polymorphisms correlate with disease progression and higher susceptibility towards vitiligo. PloS one. 2012 Dec 20;7(12):e52298.
21. Yazici, A.C., Erdal, M.E., Kaya, T.I., Ikizoglu, G., Savasog-lu, K., Camdeviren, H. and Tursen, U., 2006. Lack of association with TNF-α-308 promoter polymorphism in patients with vitiligo. Archives of dermatological research, 298(1), p.46.
22. Dwivedi, M., Laddha, N.C., Imran, M., Shah, B.J. and Begum, R., 2011. Cytotoxic T-lymphocyte-associated antigen-4 (CTLA-4) in isolated vitiligo: a genotype-phenotype correlation. Pigment cell & melanoma research, 24(4), pp.737-740.
23. Atabani, S.F., Thio, C.L., Divanovic, S., Trompette, A., Belkaid, Y., Thomas, D.L. and Karp, C.L., 2005. Association of CTLA4 polymorphism with regulatory T cell frequency. European journal of immunology, 35(7), pp.2157-2162.
24. LaBerge, G.S., Bennett, D.C., Fain, P.R. and Spritz, R.A., 2008. PTPN22 is genetically associated with risk of generalized vitiligo, but CTLA4 is not. Journal of Investigative Dermatology, 128(7), pp.1757-1762.
25. Blomhoff A, Kemp EH, Gawkrodger DJ, Weetman AP, Husebye ES, Akselsen HE, Lie BA, Undlien DE. CTLA4 polymorphisms are associated with vitiligo, in patients with concomitant autoimmune diseases. Pigment Cell Res. 2005 Feb;18(1):55-8.
26. Kemp EH, Ajjan RA, Waterman EA, Gawkrodger DJ, Cork MJ, Watson PF, Weetman AP. Analysis of a microsatellite polymorphism of the cytotoxic T-lymphocyte antigen-4 gene in patients with vitiligo. Br J Dermatol. 1999;140(1):73-8.
27. Bream JH, Young HA, Rice N, Martin MP, Smith MW, Carrington M. CCR5 promoter alleles and specific DNA binding factors. Science. 1999; 284:222–223.
